# Supplementary material
Source: HighWire-hosted journal article supplement (https://cmajopen-stage.highwire.org/highwire/filestream/89474/field_highwire_adjunct_files/2/open-2022-0055-3-at.pdf)
Supplement: open-2022-0055-3-at.pdf [file open-2022-0055-3-at.pdf]

Appendix Table 3- Categorization of opioids filled by patients undergoing same day breast surgery

|                                                                  |
|------------------------------------------------------------------|
| <b>Codeine including combinations</b>                            |
| ACETAMINOPHEN & CAFFEINE & CODEINE PHOSPHATE                     |
| CODEINE PHOSPHATE                                                |
| ACETAMINOPHEN & CAFFEINE CITRATE & CODEINE PHOSPHATE             |
| CODEINE SULFATE                                                  |
| ACETAMINOPHEN & CODEINE PHOSPHATE                                |
| ACETYLSALICYLIC ACID & BUTALBITAL & CAFFEINE & CODEINE PHOSPHATE |
| ACETYLSALICYLIC ACID & CAFFEINE CITRATE & CODEINE PHOSPHATE      |
| ACETYLSALICYLIC ACID & CODEINE PHOSPHATE & METHOCARBAMOL         |
| ACETYLSALICYLIC ACID & CAFFEINE & CODEINE PHOSPHATE              |
| CODEINE PHOSPHATE & PSEUDOEPHEDRINE HCL & TRIPROLIDINE HCL       |
| <b>Tramadol including combinations</b>                           |
| ACETAMINOPHEN & TRAMADOL                                         |
| TRAMADOL HCL                                                     |
| ACETAMINOPHEN & TRAMADOL HCL                                     |
| TRAMADOL                                                         |
| <b>Oxycodone including combinations</b>                          |
| ACETAMINOPHEN & OXYCODONE HCL                                    |
| OXYCODONE HCL                                                    |
| ACETYLSALICYLIC ACID & OXYCODONE HCL                             |
| <b>Morphine</b>                                                  |
| MORPHINE SULFATE                                                 |
| <b>Hydromorphone</b>                                             |
| HYDROMORPHONE HCL                                                |
| HYDROMORPHONE                                                    |
| <b>Methadone</b>                                                 |
| METHADONE HCL                                                    |
| METHADONE                                                        |
| <b>Other</b>                                                     |

|                                  |
|----------------------------------|
| MEPERIDINE HCL                   |
| BUPRENORPHINE HCL & NALOXONE HCL |
| FENTANYL CITRATE                 |
| PENTAZOCINE HCL                  |
| HYDROCODONE BITARTRATE           |
| NALOXONE HCL & OXYCODONE HCL     |
| TAPENTADOL HCL                   |
| BUPRENORPHINE                    |
| BUTORPHANOL TARTRATE             |
